# Supplementary material for: Optimizing Li Ion Transport in a Garnet-Type Solid Electrolyte via a Grain Boundary Design
Source: MDPI journal article supplement (doi:10.3390/batteries9110526), 2023-10-24
Supplement: s1 [file s1]

# Optimizing Li ions transport in garnet-type solid electrolyte via grain boundary design

Tao Sun<sup>1</sup>, Xiaopeng Cheng<sup>1,\*</sup>, Tianci Cao<sup>1</sup>, Mingming Wang<sup>1</sup>, Jiao Tian<sup>1</sup>, Tengfei Yan<sup>1</sup>, Dechen Qin<sup>1</sup>, Xianqiang Liu<sup>1,\*</sup>, Junxia Lu<sup>1,\*</sup> and Yuefei Zhang<sup>2</sup>

1 Faculty of Materials and Manufacturing, Beijing University of Technology, Beijing 100124, China

2 Institute of Superalloys Science and Technology, School of Materials Science and Engineering, Zhejiang University, Hangzhou 310027, China

\* Correspondence: xpcheng@bjut.edu.cn; xqliu@bjut.edu.cn;

junxialv@bjut.edu.cn;

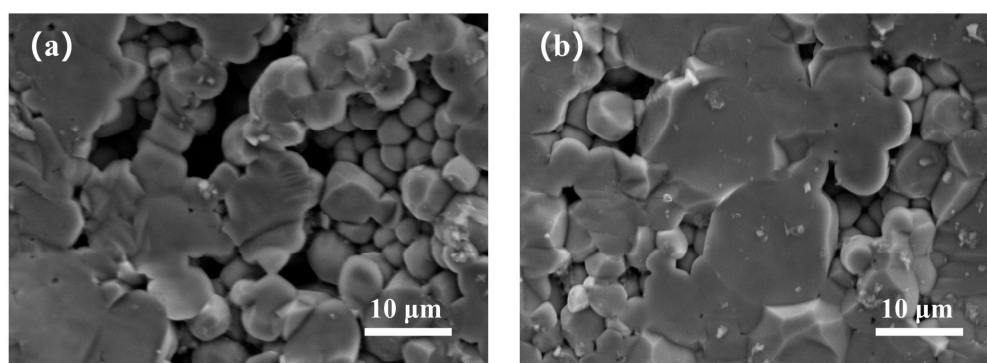

Figure S1. (a-b) SEM image of pristine and coated samples disassembled after 50 cycles.

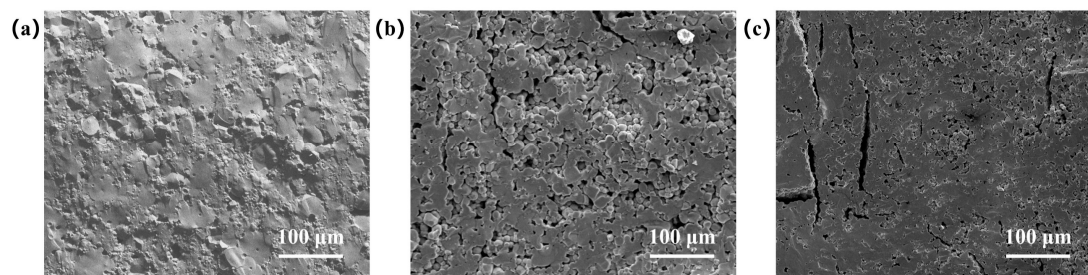

Figure S2. (a) Cross-section SEM image of LLZTO pellets. (b) Cross-section SEM image and (c) the edges of bulk image of LLZTO after 50 cycles.

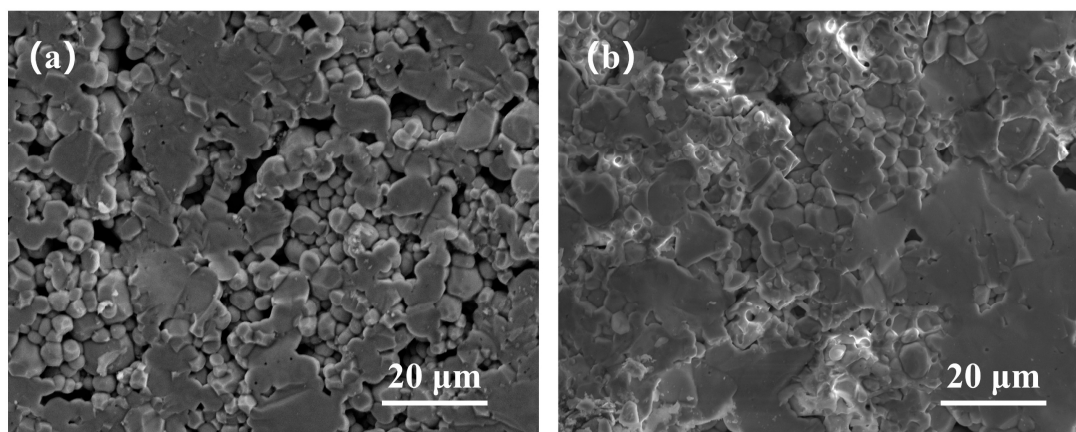

Figure S3. (a-b) SEM image of pristine and annealed samples disassembled after 50 cycles.

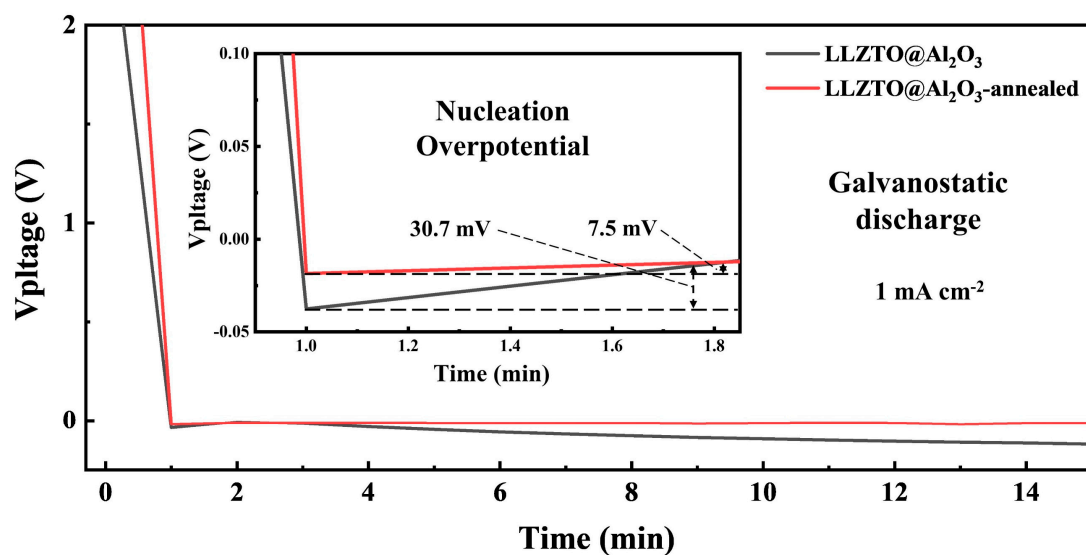

Figure S4. Voltage-capacity curves of Li plating in coated and annealed sample in the overpotential for Li nucleation at 1.0 mA cm<sup>-2</sup>, respectively.

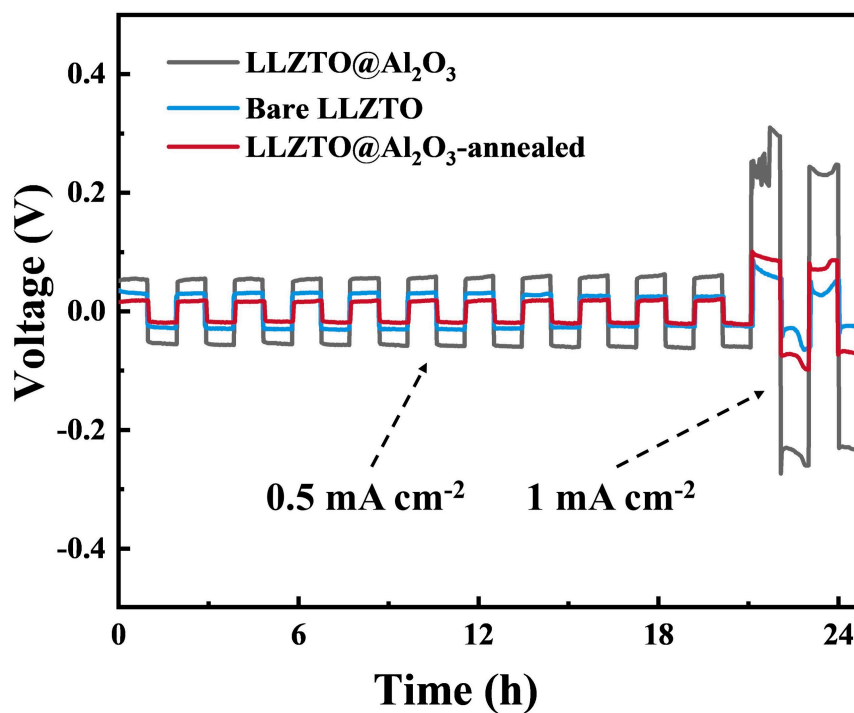

Figure S5. Constant current cycle curves of Li/LLZTO/Li, Li/LLZTO@Al<sub>2</sub>O<sub>3</sub>/Li, and Li/LLZTO@Al<sub>2</sub>O<sub>3</sub>-annealed/Li symmetrical batteries at a current density of 0.5 mA cm<sup>-2</sup> are presented in this figure.

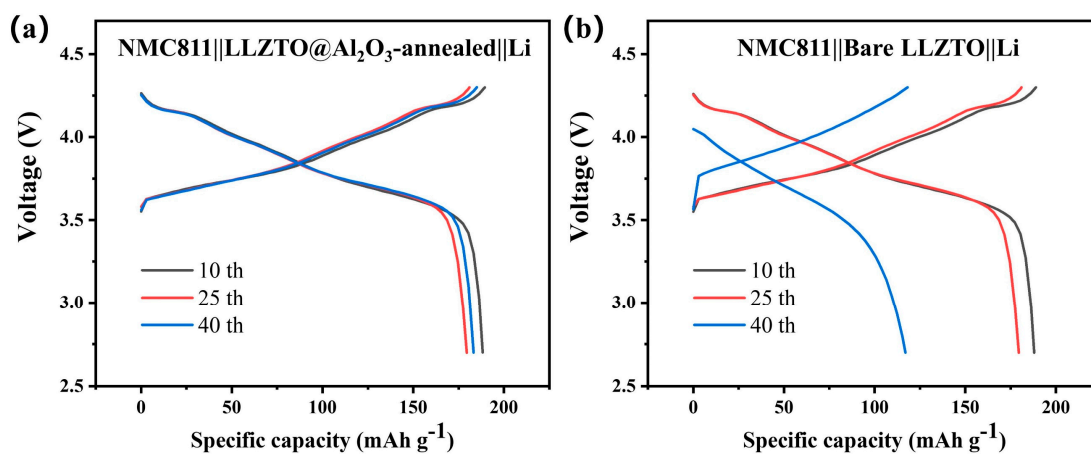

Figure S6. Voltage-versus-capacity plot of NMC811 cells using bare LLZTO and LLZTO@Al<sub>2</sub>O<sub>3</sub>-annealed as electrolyte and Li metal as anodes, respectively.
